# Supplementary material for: Associations of Fetal and Infant Weight Change With General, Visceral, and Organ Adiposity at School Age
Source: PubMed Central journal article supplement (PMC6487630; doi:10.1001/jamanetworkopen.2019.2843), 2019-04-26

## Supplementary Online Content

Vogelezang S, Santos S, Toemen L, Oei EHG, Felix JF, Jaddoe VWV. Associations of fetal and infant weight change with general, visceral, and organ adiposity at school age. *JAMA Netw Open*. 2019;2(4):e192843. doi:10.1001/jamanetworkopen.2019.2843

**eTable 1.** Nonresponse Analysis in Singleton Live Births With and Without Measures of Adiposity Available

**eTable 2.** Associations of Fetal and Infant Growth With Childhood Body Composition From Conditional Analyses

**eTable 3.** Associations of Fetal and Infant Growth With Childhood Body Composition and Adiposity From Conditional Analyses

**eTable 4.** Associations of Fetal and Infant Growth With Childhood Body Composition

**eTable 5.** Visceral and Organ Fat for 9 Different Growth Patterns

**eTable 6.** Associations of Fetal and Infant Growth With Childhood Body Composition and Adiposity

**eTable 7.** Associations of Infant Growth Patterns With Childhood Body Composition

**eTable 8.** Associations of Infant Growth Patterns With Childhood Body Composition and Adiposity

**eFigure.** Flowchart of Participants

This supplementary material has been provided by the authors to give readers additional information about their work.

**eTable 1.** Nonresponse Analysis in Singleton Live Births With and Without Measures of Adiposity Available

| Characteristics                                                  | Participants, No (%) <sup>a</sup>           |                                                 |         |
|------------------------------------------------------------------|---------------------------------------------|-------------------------------------------------|---------|
|                                                                  | Children included in the analysis (n= 3205) | Children not included in the analysis (n= 6696) | P Value |
| <b>Maternal pregnancy characteristics</b>                        |                                             |                                                 |         |
| Age (years), mean (SD) <sup>b</sup>                              | 31.1 (4.9)                                  | 29.4 (5.5)                                      | <.001   |
| Height (cm), mean (SD) <sup>b</sup>                              | 168.0 (7.3)                                 | 166.8 (7.4)                                     | <.001   |
| Weight (kg), median (90% range) <sup>b</sup>                     | 64.0 (50.0; 90.0)                           | 64.0 (50.0; 91.0)                               | .28     |
| Pre-pregnancy body mass index, median (90% range) <sup>b,c</sup> | 22.5 (18.7; 32.0)                           | 22.7 (18.6; 33.8)                               | .06     |
| Parity <sup>d</sup>                                              |                                             |                                                 | <.001   |
| 0                                                                | 1787/3091 (57.8)                            | 3449/6426 (53.7)                                |         |
| ≥ 1                                                              | 1304/3091 (42.4)                            | 2977/6426 (46.3)                                |         |
| Educational level <sup>d</sup>                                   |                                             |                                                 | <.001   |
| Lower                                                            | 1400/2954 (47.4)                            | 3546/5704 (62.2)                                |         |
| Higher                                                           | 1554/2954 (52.6)                            | 2158/5704 (37.8)                                |         |
| Folic acid use <sup>d</sup>                                      |                                             |                                                 | <.001   |
| No                                                               | 445/2204 (20.2)                             | 1498/4427 (33.8)                                |         |
| Yes                                                              | 1759/2204 (79.8)                            | 2929/4427 (66.2)                                |         |
| Smoking during pregnancy <sup>d</sup>                            |                                             |                                                 | <.001   |
| No                                                               | 1968/2550 (77.2)                            | 3717/5272 (70.5)                                |         |
| Yes                                                              | 582/2550 (22.8)                             | 1555/5272 (29.5)                                |         |
| <b>Childhood characteristics</b>                                 |                                             |                                                 |         |
| Boys <sup>d</sup>                                                | 1573/3205 (49.1)                            | 3359/6536 (51.4)                                | .03     |
| Birth weight (g), mean (SD) <sup>b</sup>                         | 3444 (554)                                  | 3356 (600)                                      | <.001   |
| Age at visit (years), mean (SD) <sup>b</sup>                     | 9.8 (0.3)                                   | 9.8 (0.4)                                       | <.001   |
| Race/ethnicity <sup>d</sup>                                      |                                             |                                                 | <.001   |
| European                                                         | 2134/3141 (67.0)                            | 3550/6076 (58.4)                                |         |
| Non-European                                                     | 1007/3141 (32.1)                            | 2526/6076 (41.6)                                |         |
| Breastfeeding, ever <sup>d</sup>                                 | 2513 (92.8)                                 | 3708 (91.1)                                     | .01     |

<sup>a</sup>Characteristics are based on observed, not imputed data.

<sup>b</sup>Differences in characteristics for children with and without fat measures available were evaluated using Independent-samples T test for continuous variables.

<sup>c</sup>Calculated as weight in kilograms divided by height in meters squared.

<sup>d</sup>Differences in characteristics for children with and without fat measures available were evaluated using  $\chi^2$  test for categorical variables.

**eTable 2.** Associations of Fetal and Infant Growth With Childhood Body Composition From Conditional Analyses

| Infant and Fetal Weight Standard Deviation Scores | Standard Deviation Scores, Regression Coefficients (95% CI) |                                            |                                                 |
|---------------------------------------------------|-------------------------------------------------------------|--------------------------------------------|-------------------------------------------------|
|                                                   | Body mass index <sup>a,b</sup><br>(n= 3205)                 | Fat mass index <sup>b,c</sup><br>(n= 3185) | Fat free mass index <sup>a,b</sup><br>(n= 3185) |
| At 20 wk (n= 2729)                                | 0.04 (0.001; 0.09)                                          | -0.002 (-0.05; 0.04)                       | 0.05 (0.003; 0.09)                              |
| At 30 wk (n= 2676)                                | 0.05 (0.01; 0.09)                                           | -0.002 (-0.05; 0.04)                       | 0.05 (0.01; 0.09)                               |
| At birth (n= 2676)                                | 0.08 (0.03; 0.12)                                           | -0.01 (-0.05; 0.04)                        | 0.15 (0.11; 0.10)                               |
| At 6 mo (n= 2212)                                 | 0.20 (0.16; 0.25)                                           | 0.11 (0.07; 0.16)                          | 0.19 (0.15; 0.23)                               |
| At 12 mo (n= 1912)                                | 0.19 (0.15; 0.23)                                           | 0.09 (0.05; 0.14)                          | 0.17 (0.13; 0.21)                               |
| At 24 mo (n= 1539)                                | 0.22 (0.18; 0.26)                                           | 0.10 (0.05; 0.14)                          | 0.21 (0.17; 0.25)                               |

<sup>a</sup>Coefficients are linear regression coefficients from conditional analyses based on SD scores of the outcome measures.

<sup>b</sup>Models are adjusted for family-based sociodemographic factors (maternal age and educational level), maternal lifestyle-related factors (pre-pregnancy body mass index, smoking during pregnancy, folic acid use during pregnancy, and parity), and childhood factors (age at visit, sex, race/ethnicity, and breastfeeding).

<sup>c</sup>Regression coefficients are linear regression coefficients from conditional analyses based on SD scores of natural log-transformed outcome measures.

**eTable 3.** Associations of Fetal and Infant Growth With Childhood Body Composition and Adiposity From Conditional Analyses

| Infant and Fetal Weight Standard Deviation Scores | Standard Deviation Scores, Regression Coefficients (95% CI) |                                            |                                                 |                                                |                                                |                                                   |
|---------------------------------------------------|-------------------------------------------------------------|--------------------------------------------|-------------------------------------------------|------------------------------------------------|------------------------------------------------|---------------------------------------------------|
|                                                   | Body mass index <sup>a,b</sup><br>(n= 3205)                 | Fat mass index <sup>b,c</sup><br>(n= 3185) | Fat free mass index <sup>a,b</sup><br>(n= 3185) | Visceral fat index <sup>b,c</sup><br>(n= 2731) | Liver fat fraction <sup>b,b</sup><br>(n= 3058) | Pericardial fat index <sup>b,c</sup><br>(n= 2839) |
| At 20 wk (n= 2729)                                | 0.04 (-0.001; 0.09)                                         | 0.0004 (-0.05; 0.05)                       | 0.05 (0.004; 0.09)                              | 0.004 (-0.05; 0.06)                            | 0.03 (-0.02; 0.09)                             | 0.01 (-0.04; 0.07)                                |
| At 30 wk (n= 2676)                                | 0.05 (0.003; 0.09)                                          | -0.004 (-0.05; 0.04)                       | 0.05 (0.01; 0.09)                               | -0.003 (-0.06; 0.05)                           | -0.05 (-0.10; -0.003)                          | 0.07 (0.02; 0.13)                                 |
| At birth (n= 2676)                                | 0.04 (-0.001; 0.09)                                         | -0.04 (-0.09; 0.004)                       | 0.14 (0.09; 0.18)                               | -0.01 (-0.06; 0.05)                            | -0.03 (-0.08; 0.02)                            | 0.06 (0.01; 0.12)                                 |
| At 6 mo (n= 2212)                                 | 0.25 (0.20; 0.29)                                           | 0.16 (0.12; 0.21)                          | 0.22 (0.17; 0.26)                               | 0.09 (0.04; 0.14)                              | 0.08 (0.03; 0.13)                              | 0.04 (-0.01; 0.10)                                |
| At 12 mo (n= 1912)                                | 0.18 (0.14; 0.23)                                           | 0.09 (0.05; 0.14)                          | 0.17 (0.13; 0.21)                               | 0.09 (0.03; 0.14)                              | 0.07 (0.02; 0.12)                              | 0.03 (-0.03; 0.08)                                |
| At 24 mo (n= 1539)                                | 0.22 (0.18; 0.27)                                           | 0.10 (0.06; 0.15)                          | 0.22 (0.18; 0.26)                               | 0.06 (0.004; 0.11)                             | 0.06 (0.01; 0.11)                              | 0.004 (-0.05; 0.06)                               |

<sup>a</sup>Regression coefficients are linear regression coefficients from conditional analyses based on SD scores of the outcome measures.

<sup>b</sup>Models are adjusted for childhood age at visit and sex.

<sup>c</sup>Regression coefficients are linear regression coefficients from conditional analyses based on SD scores of natural log-transformed outcome measures.

**eTable 4.** Associations of Fetal and Infant Growth With Childhood Body Composition

| Fetal Growth | Infant Growth         | Standard Deviation Scores, Regression Coefficients (95% CI) |                                            |                                                 |
|--------------|-----------------------|-------------------------------------------------------------|--------------------------------------------|-------------------------------------------------|
|              |                       | Body mass index <sup>a,b</sup><br>(n= 3205)                 | Fat mass index <sup>b,c</sup><br>(n= 3185) | Fat free mass index <sup>a,b</sup><br>(n= 3185) |
| Deceleration | Deceleration (n= 78)  | -0.32 (-0.53; -0.12)                                        | -0.17 (-0.37; 0.02)                        | -0.22 (-0.43; -0.02)                            |
|              | Normal (n= 261)       | -0.16 (-0.29; -0.03)                                        | -0.10 (-0.23; 0.02)                        | -0.12 (-0.25; 0.01)                             |
|              | Acceleration (n= 263) | 0.27 (0.14; 0.40)                                           | 0.19 (0.07; 0.32)                          | 0.20 (0.07; 0.33)                               |
| Normal       | Deceleration (n= 213) | -0.24 (-0.38; -0.10)                                        | -0.18 (-0.31; -0.04)                       | -0.17 (-0.30; -0.03)                            |
|              | Normal (n= 533)       | Reference                                                   | Reference                                  | Reference                                       |
|              | Acceleration (n= 271) | 0.40 (0.27; 0.53)                                           | 0.19 (0.07; 0.32)                          | 0.39 (0.26; 0.52)                               |
| Acceleration | Deceleration (n= 319) | -0.07 (-0.20; 0.05)                                         | -0.09 (-0.21; 0.03)                        | 0.07 (-0.05; 0.19)                              |
|              | Normal (n= 316)       | 0.24 (0.12; 0.36)                                           | 0.09 (-0.03; 0.21)                         | 0.26 (0.14; 0.38)                               |
|              | Acceleration (n= 116) | 0.42 (0.24; 0.59)                                           | 0.13 (-0.04; 0.30)                         | 0.52 (0.34; 0.70)                               |

<sup>a</sup>Regression coefficients are linear regression coefficients based on SD scores of the outcome.

<sup>b</sup>Models are adjusted for family-based sociodemographic factors (maternal age and educational level), maternal lifestyle-related factors (pre-pregnancy body mass index, smoking during pregnancy, folic acid use during pregnancy, and parity), and childhood factors (age at visit, sex, ethnicity/race, and breastfeeding).

<sup>c</sup>Regression coefficients are linear regression coefficients based on SD scores of natural log-transformed outcome measures.

**eTable 5.** Visceral and Organ Fat for 9 Different Growth Patterns

| Fetal Growth | Infant Growth         | Medians (90% range)           |                                     |                                               |
|--------------|-----------------------|-------------------------------|-------------------------------------|-----------------------------------------------|
|              |                       | Visceral fat (g)<br>(n= 2731) | Liver fat fraction (%)<br>(n= 3058) | Pericardial fat (g) <sup>a</sup><br>(n= 2839) |
| Deceleration | Deceleration (n= 78)  | 307 (177; 714)                | 1.9 (1.3; 4.9)                      | 9.9 (4.1; 15.5)                               |
|              | Normal (n= 261)       | 330 (155; 701)                | 1.9 (1.3; 4.4)                      | 9.9 (5.1; 18.7)                               |
|              | Acceleration (n= 263) | 412 (190; 957)                | 2.2 (1.4; 5.3)                      | 10.2 (5.2; 21.0)                              |
| Normal       | Deceleration (n= 213) | 338 (187; 694)                | 1.9 (1.3; 3.4)                      | 10.1 (5.0; 21.2)                              |
|              | Normal (n= 533)       | 365 (179; 803)                | 2.0 (1.3; 3.8)                      | 10.4 (5.1; 20.1)                              |
|              | Acceleration (n= 271) | 398 (207; 956)                | 2.1 (1.4; 4.3)                      | 11.3 (5.0; 20.6)                              |
| Acceleration | Deceleration (n= 319) | 348 (183; 805)                | 1.9 (1.3; 3.8)                      | 10.7 (5.5; 20.1)                              |
|              | Normal (n= 316)       | 396 (213; 854)                | 2.0 (1.4; 3.6)                      | 11.6 (5.9; 21.4)                              |
|              | Acceleration (n= 116) | 411 (209; 982)                | 2.0 (1.3; 4.0)                      | 11.7 (6.3; 23.4)                              |

**eTable 6.** Associations of Fetal and Infant Growth With Childhood Body Composition and Adiposity

| Fetal Growth                   | Infant Growth         | Standard Deviation Scores, Regression Coefficients (95% CI) |                                            |                                                 |                                                |                                                |                                                   |
|--------------------------------|-----------------------|-------------------------------------------------------------|--------------------------------------------|-------------------------------------------------|------------------------------------------------|------------------------------------------------|---------------------------------------------------|
|                                |                       | Body mass index <sup>a,b</sup><br>(n= 3205)                 | Fat mass index <sup>b,c</sup><br>(n= 3185) | Fat free mass index <sup>a,b</sup><br>(n= 3185) | Visceral fat index <sup>b,c</sup><br>(n= 2731) | Liver fat fraction <sup>b,c</sup><br>(n= 3058) | Pericardial fat index <sup>b,c</sup><br>(n= 2839) |
| Deceleration                   | Deceleration (n= 78)  | -0.30 (-0.52; -0.08)                                        | -0.16 (-0.37; 0.05)                        | -0.22 (-0.43; -0.01)                            | 0.04 (-0.22; 0.29)                             | -0.04 (-0.27; 0.19)                            | -0.04 (-0.28; 0.21)                               |
|                                | Normal (n= 261)       | -0.09 (-0.23; 0.05)                                         | -0.02 (-0.15; 0.12)                        | -0.10 (-0.23; -0.04)                            | -0.15 (-0.30; 0.01)                            | -0.01 (-0.16; 0.13)                            | -0.04 (-0.19; 0.11)                               |
|                                | Acceleration (n= 263) | 0.39 (0.25; 0.53)                                           | 0.32 (0.19; 0.46)                          | 0.26 (0.12; 0.39)                               | 0.26 (0.10; 0.41)                              | 0.41 (0.27; 0.56)                              | -0.05 (-0.20; 0.11)                               |
| Normal                         | Deceleration (n= 213) | -0.21 (-0.36; -0.06)                                        | -0.16 (-0.31; -0.02)                       | -0.15 (-0.29; -0.01)                            | -0.06 (-0.22; 0.10)                            | -0.10 (-0.25; 0.06)                            | 0.05 (-0.11; 0.22)                                |
|                                | Normal (n= 533)       | Reference                                                   | Reference                                  | Reference                                       | Reference                                      | Reference                                      | Reference                                         |
|                                | Acceleration (n= 271) | 0.52 (0.38; 0.66)                                           | 0.31 (0.18; 0.45)                          | 0.44 (0.31; 0.57)                               | 0.14 (-0.01; 0.29)                             | 0.16 (0.02; 0.30)                              | -0.03 (-0.18; 0.13)                               |
| Acceleration                   | Deceleration (n= 319) | -0.03 (-0.16; 0.10)                                         | -0.07 (-0.20; 0.06)                        | 0.10 (-0.02; 0.22)                              | -0.02 (-0.17; 0.12)                            | -0.04 (-0.18; 0.09)                            | 0.17 (0.02; 0.31)                                 |
|                                | Normal (n= 316)       | 0.28 (0.15; 0.42)                                           | 0.13 (-0.003; 0.25)                        | 0.30 (0.18; 0.42)                               | 0.13 (-0.02; 0.27)                             | 0.05 (-0.08; 0.19)                             | 0.09 (-0.05; 0.24)                                |
|                                | Acceleration (n= 116) | 0.59 (0.40; 0.78)                                           | 0.30 (0.12; 0.49)                          | 0.61 (0.43; 0.79)                               | 0.12 (-0.09; 0.33)                             | 0.02 (-0.18; 0.21)                             | 0.11 (-0.10; 0.32)                                |
| <i>P</i> value for interaction |                       | .04                                                         | .03                                        | .09                                             | .09                                            | <.001                                          | .45                                               |

<sup>a</sup>Regression coefficients are linear regression coefficients based on SD scores of the outcome.

<sup>b</sup>Models are adjusted for childhood age at visit and sex. *P* value of interaction term is between fetal and infant growth in model adjusted for childhood age at visit and sex

<sup>c</sup>Regression coefficients are linear regression coefficients based on SD scores of natural log-transformed outcome measures.

**eTable 7.** Associations of Infant Growth Patterns With Childhood Body Composition

| Characteristics                                      | Standard Deviation Scores, Regression Coefficients (95% CI) |                                            |                                                 |
|------------------------------------------------------|-------------------------------------------------------------|--------------------------------------------|-------------------------------------------------|
|                                                      | Body mass index <sup>a,b</sup><br>(n= 3205)                 | Fat mass index <sup>b,c</sup><br>(n= 3185) | Fat free mass index <sup>a,b</sup><br>(n= 3185) |
| <b>Children born small for gestational age</b>       |                                                             |                                            |                                                 |
| PWV, kg/y (n= 161)                                   | 0.15 (0.07; 0.24)                                           | 0.09 (0.01; 0.18)                          | 0.12 (0.03; 0.20)                               |
| BMIAP (n= 151)                                       | 0.35 (0.12; 0.58)                                           | 0.28 (0.05; 0.50)                          | 0.31 (0.09; 0.52)                               |
| AGEAP, mo (n= 151)                                   | 0.31 (-0.004; 0.62)                                         | 0.26 (-0.05; 0.57)                         | 0.19 (-0.10; 0.48)                              |
| <b>Children born appropriate for gestational age</b> |                                                             |                                            |                                                 |
| PWV, kg/y (n= 2352)                                  | 0.13 (0.11; 0.15)                                           | 0.07 (0.05; 0.09)                          | 0.12 (0.10; 0.14)                               |
| BMIAP (n= 2207)                                      | 0.40 (0.35; 0.45)                                           | 0.29 (0.25; 0.34)                          | 0.45 (0.40; 0.50)                               |
| AGEAP, mo (n= 2207)                                  | 0.07 (-0.01; 0.14)                                          | 0.03 (-0.05; 0.10)                         | 0.07 (0.0004; 0.15)                             |
| <b>Children born large for gestational age</b>       |                                                             |                                            |                                                 |
| PWV, kg/y (n= 195)                                   | 0.16 (0.10; 0.23)                                           | 0.12 (0.06; 0.18)                          | 0.11 (0.05; 0.18)                               |
| BMIAP (n= 185)                                       | 0.41 (0.26; 0.56)                                           | 0.30 (0.14; 0.45)                          | 0.46 (0.31; 0.61)                               |
| AGEAP, mo (n= 185)                                   | 0.21 (-0.02; 0.45)                                          | 0.17 (-0.06; 0.40)                         | 0.13 (-0.11; 0.36)                              |

Abbreviations: PWV, peak weight velocity; BMIAP, body mass index at adiposity peak (calculated as weight in kilograms divided by height in meters squared); AGEAP, age at adiposity peak.

<sup>a</sup>Regression coefficients are linear regression coefficients based on SD scores of the outcome.

<sup>b</sup>Models are adjusted for family-based sociodemographic factors (maternal age and educational level), maternal lifestyle-related factors (pre-pregnancy body mass index, smoking during pregnancy, folic acid use during pregnancy, and parity), and childhood factors (age at visit, sex, ethnicity/race, birth weight, and breastfeeding).

<sup>c</sup>Regression coefficients are linear regression coefficients based on SD scores of natural log-transformed outcome measures.



**eTable 8.** Associations of Infant Growth Patterns With Childhood Body Composition and Adiposity

| Characteristics                                      | Standard Deviation Scores, Regression Coefficients (95% CI) |                                            |                                                 |                                                |                                                |                                                   |
|------------------------------------------------------|-------------------------------------------------------------|--------------------------------------------|-------------------------------------------------|------------------------------------------------|------------------------------------------------|---------------------------------------------------|
|                                                      | Body mass index <sup>a,b</sup><br>(n= 3205)                 | Fat mass index <sup>b,c</sup><br>(n= 3185) | Fat free mass index <sup>a,b</sup><br>(n= 3185) | Visceral fat index <sup>b,c</sup><br>(n= 2731) | Liver fat fraction <sup>b,c</sup><br>(n= 3058) | Pericardial fat index <sup>b,c</sup><br>(n= 2839) |
| <b>Children born small for gestational age</b>       |                                                             |                                            |                                                 |                                                |                                                |                                                   |
| PWV, kg/y (n= 161)                                   | 0.16 (0.07; 0.25)                                           | 0.10 (0.01; 0.19)                          | 0.12 (0.03; 0.20)                               | 0.10 (0.02; 0.18)                              | 0.12 (0.05; 0.19)                              | 0.03 (-0.04; 0.11)                                |
| BMIAP (n= 151)                                       | 0.35 (0.11; 0.59)                                           | 0.26 (0.02; 0.50)                          | 0.32 (0.11; 0.53)                               | 0.19 (-0.01; 0.39)                             | 0.31 (0.13; 0.48)                              | 0.05 (-0.14; 0.25)                                |
| AGEAP, mo (n= 151)                                   | 0.24 (-0.08; 0.57)                                          | 0.19 (-0.13; 0.51)                         | 0.17 (-0.12; 0.46)                              | 0.24 (-0.06; 0.552)                            | 0.002 (-0.27; 0.28)                            | 0.08 (-0.21; 0.37)                                |
| <b>Children born appropriate for gestational age</b> |                                                             |                                            |                                                 |                                                |                                                |                                                   |
| PWV, kg/y (n= 2352)                                  | 0.16 (0.14; 0.18)                                           | 0.10 (0.08; 0.12)                          | 0.13 (0.11; 0.15)                               | 0.05 (0.03; 0.08)                              | 0.05 (0.03; 0.07)                              | 0.03 (0.004; 0.05)                                |
| BMIAP (n= 2207)                                      | 0.47 (0.42; 0.52)                                           | 0.34 (0.29; 0.39)                          | 0.49 (0.45; 0.54)                               | 0.20 (0.14; 0.26)                              | 0.09 (0.04; 0.15)                              | 0.16 (0.10; 0.22)                                 |
| AGEAP, mo (n= 2207)                                  | -0.02 (-0.10; 0.06)                                         | -0.04 (-0.11; 0.04)                        | 0.01 (-0.07; 0.08)                              | -0.02 (-0.11; 0.07)                            | -0.02 (-0.11; 0.06)                            | -0.02 (-0.10; 0.07)                               |
| <b>Children born large for gestational age</b>       |                                                             |                                            |                                                 |                                                |                                                |                                                   |
| PWV, kg/y (n= 195)                                   | 0.17 (0.10; 0.23)                                           | 0.13 (0.07; 0.19)                          | 0.10 (0.04; 0.17)                               | 0.07 (0.01; 0.13)                              | 0.06 (0.01; 0.12)                              | 0.04 (-0.03; 0.10)                                |
| BMIAP (n= 185)                                       | 0.40 (0.24; 0.56)                                           | 0.29 (0.12; 0.45)                          | 0.46 (0.31; 0.61)                               | 0.06 (-0.11; 0.23)                             | 0.09 (-0.07; 0.24)                             | 0.06 (-0.11; 0.23)                                |
| AGEAP, mo (n= 185)                                   | 0.13 (-0.12; 0.37)                                          | 0.09 (-0.15; 0.34)                         | 0.08 (-0.15; 0.31)                              | -0.10 (-0.35; 0.16)                            | 0.03 (-0.20; 0.27)                             | 0.09 (-0.17; 0.34)                                |

Abbreviations: PWV, peak weight velocity; BMIAP, body mass index at adiposity peak (calculated as weight in kilograms divided by height in meters squared); AGEAP, age at adiposity peak.

<sup>a</sup>Regression coefficients are linear regression coefficients based on SD scores of the outcome.

<sup>b</sup>Models are adjusted for childhood age at visit and sex.

<sup>c</sup>Regression coefficients are linear regression coefficients based on SD scores of natural log-transformed outcome measures.

**eFigure.** Flowchart of Participants

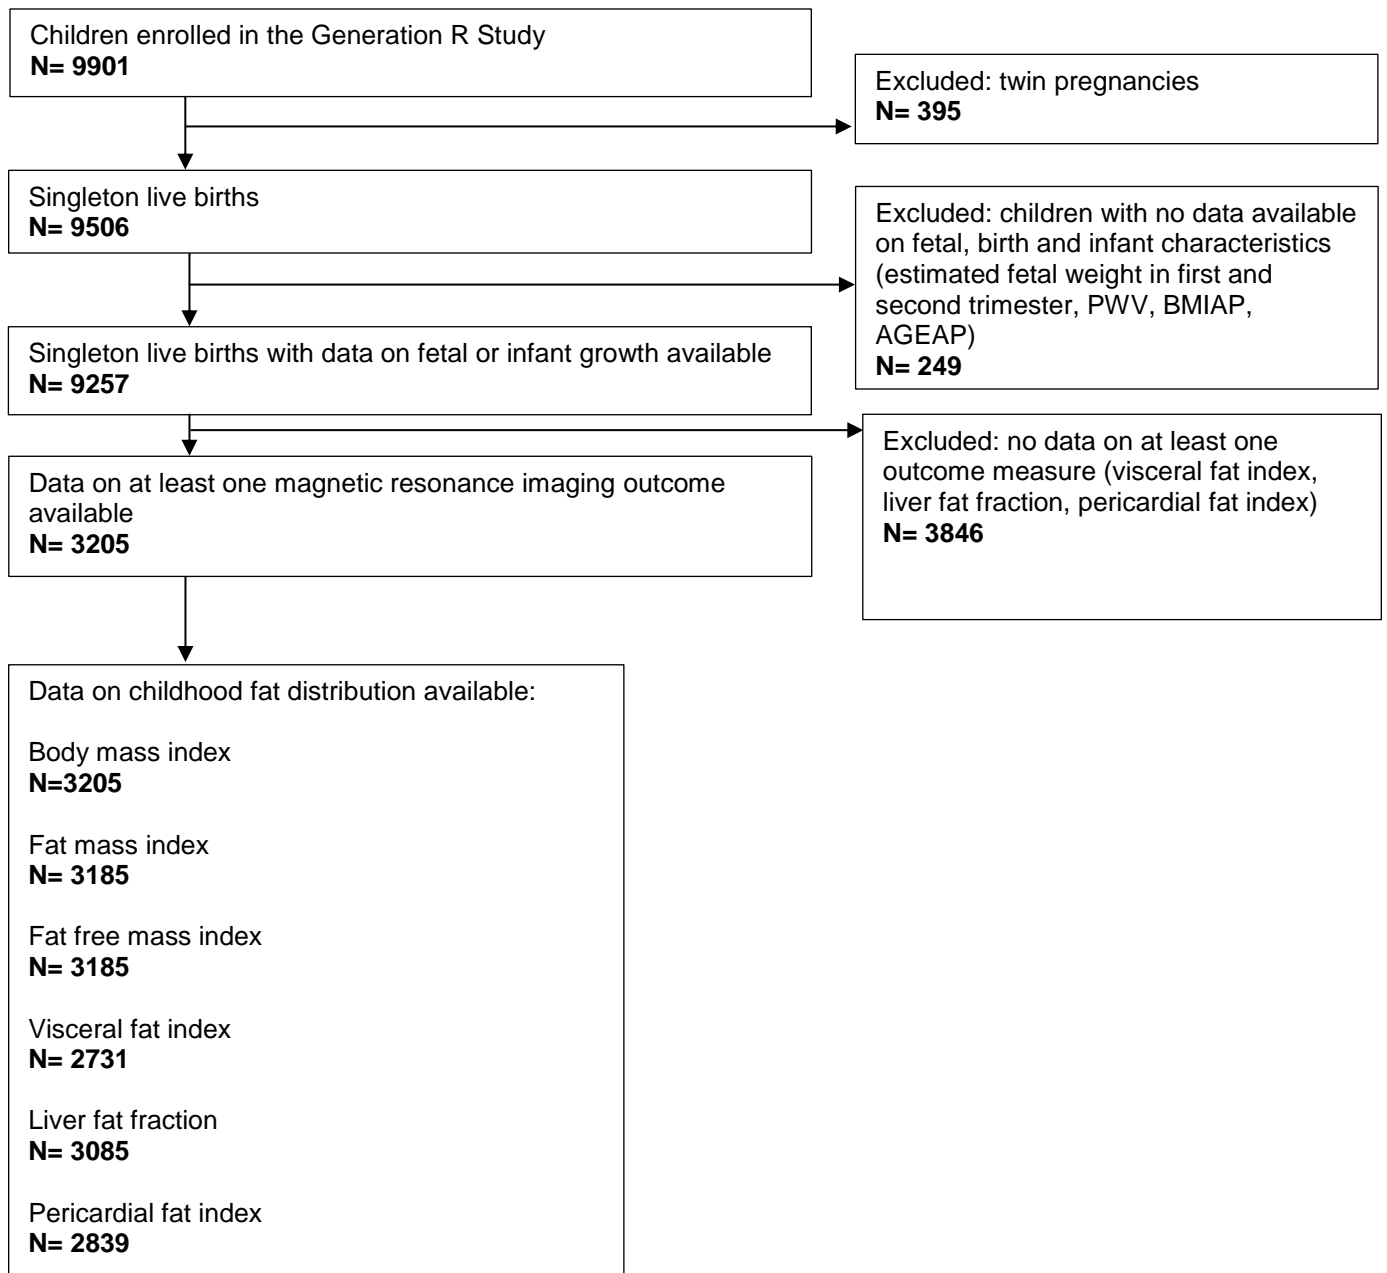

Supplement: jamanetwopen-2-e192843-s001.pdf [file jamanetwopen-2-e192843-s001.pdf]
